# Supplementary material
Source: ML conference proceedings conference paper supplement (https://openreview.net/forum?id=e0uknAgETh)
Supplement: supplementary_material [file attachment]

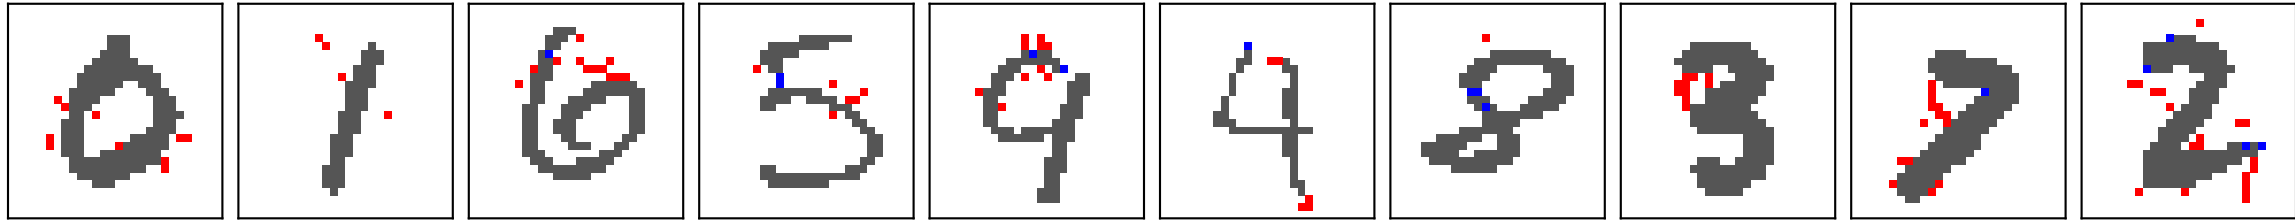

Zero → Two

One → Seven

Six → Zero

Five → Three

Nine → Four

Four → Nine

Eight → Two

Three → Nine

Seven → Nine

Two → Seven
