# Supplementary material
Source: ML conference proceedings conference paper supplement (https://openreview.net/forum?id=e0uknAgETh)

Confusion matrix, NMNIST

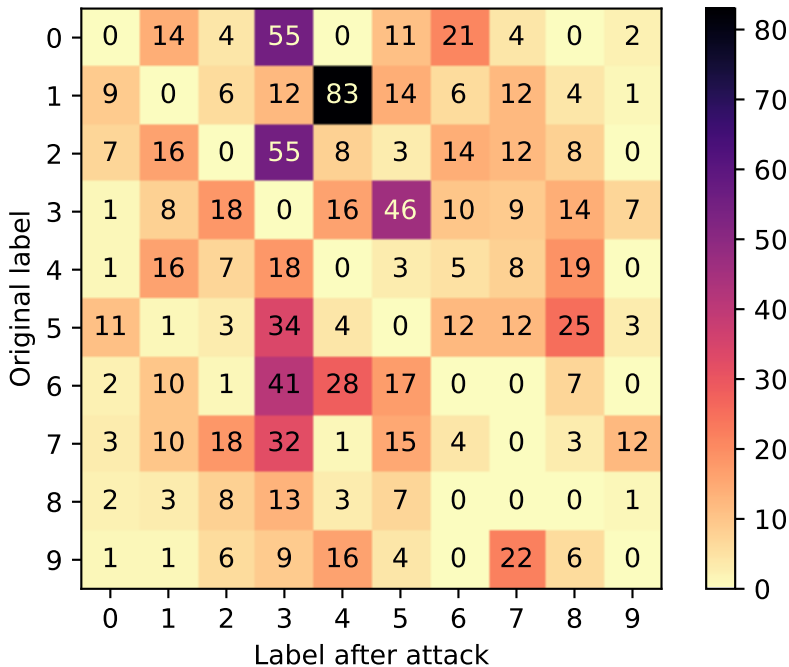

Supplement: supplementary_material [file attachment]

Air Guitar →  
Other

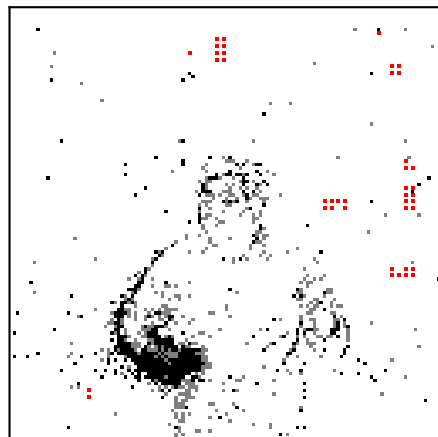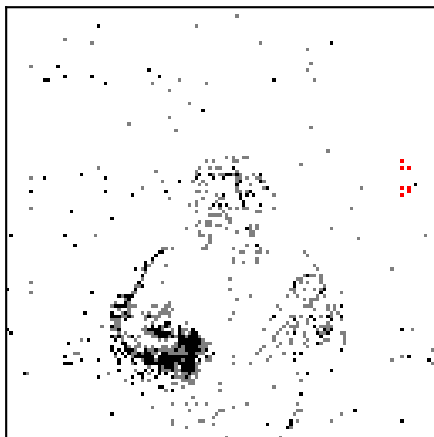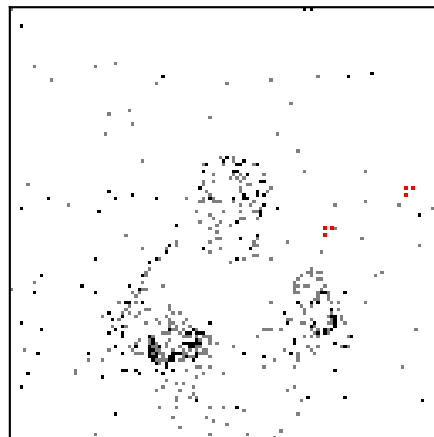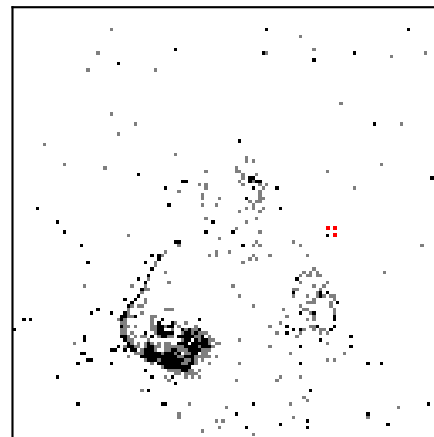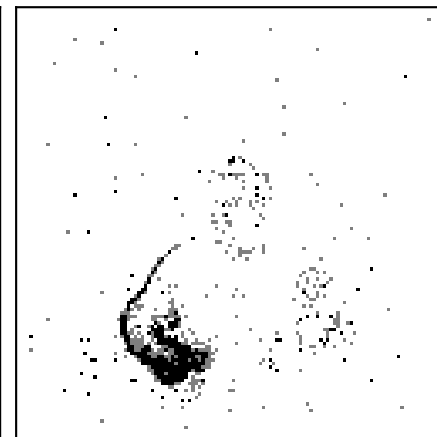

RH Wave →  
RH Clockwise

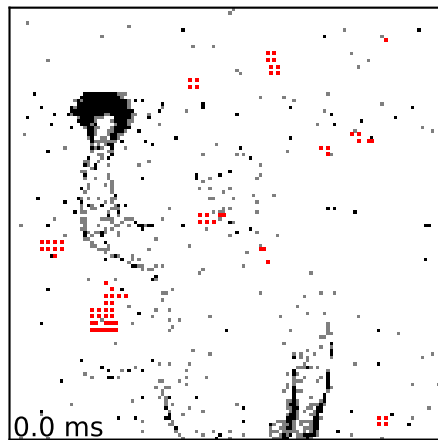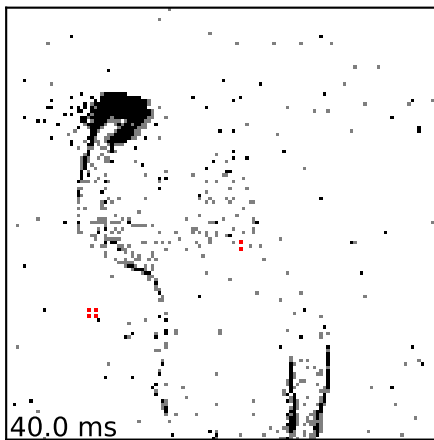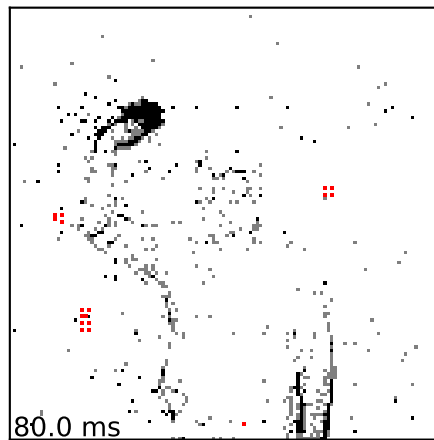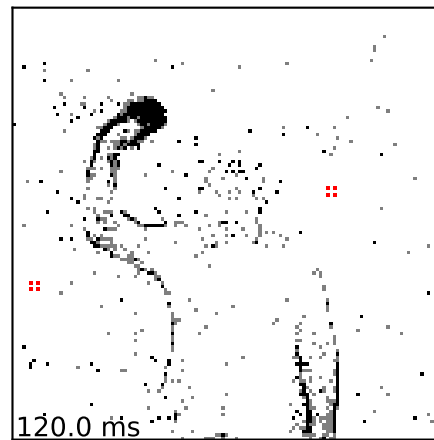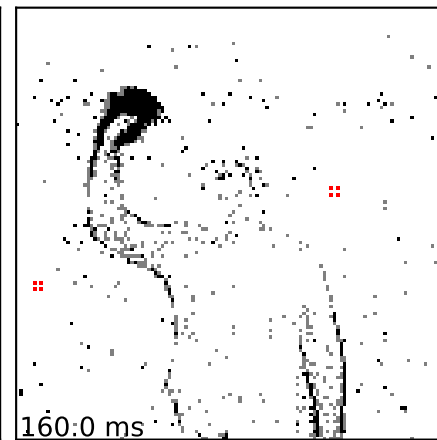

Supplement: supplementary_material [file attachment]

Air Guitar →  
Other

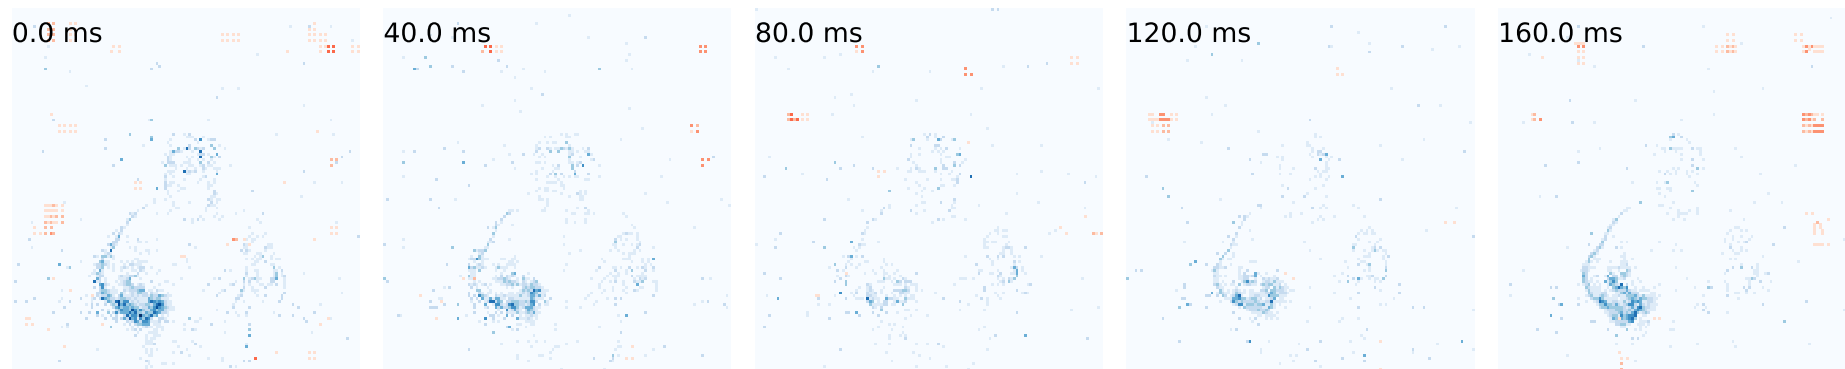

Hand Clap →  
Other

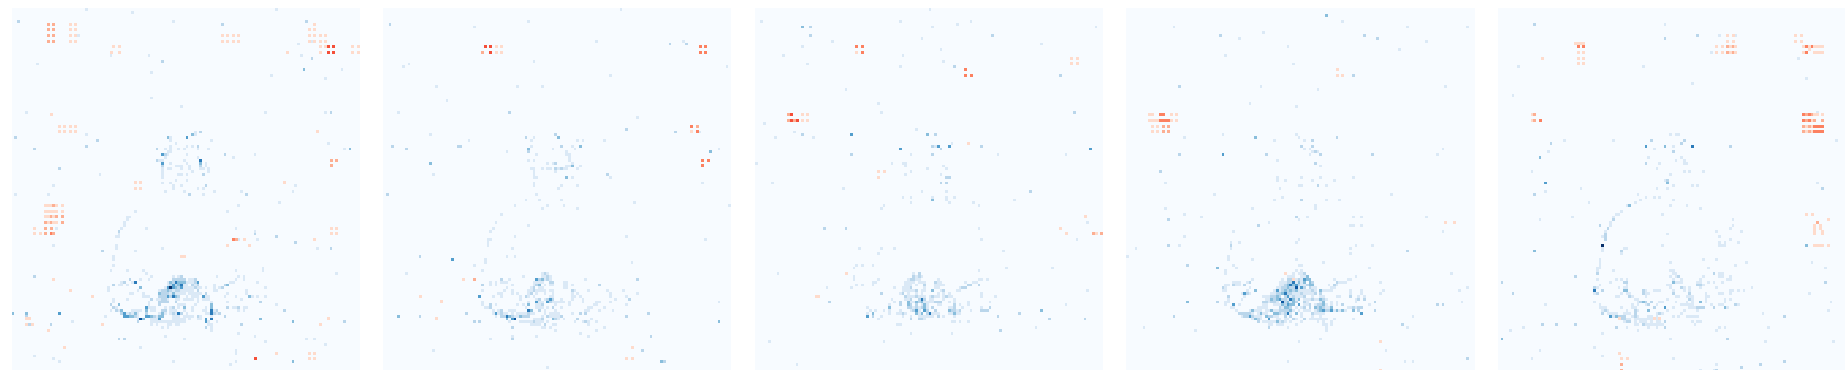

RH Wave →  
Other

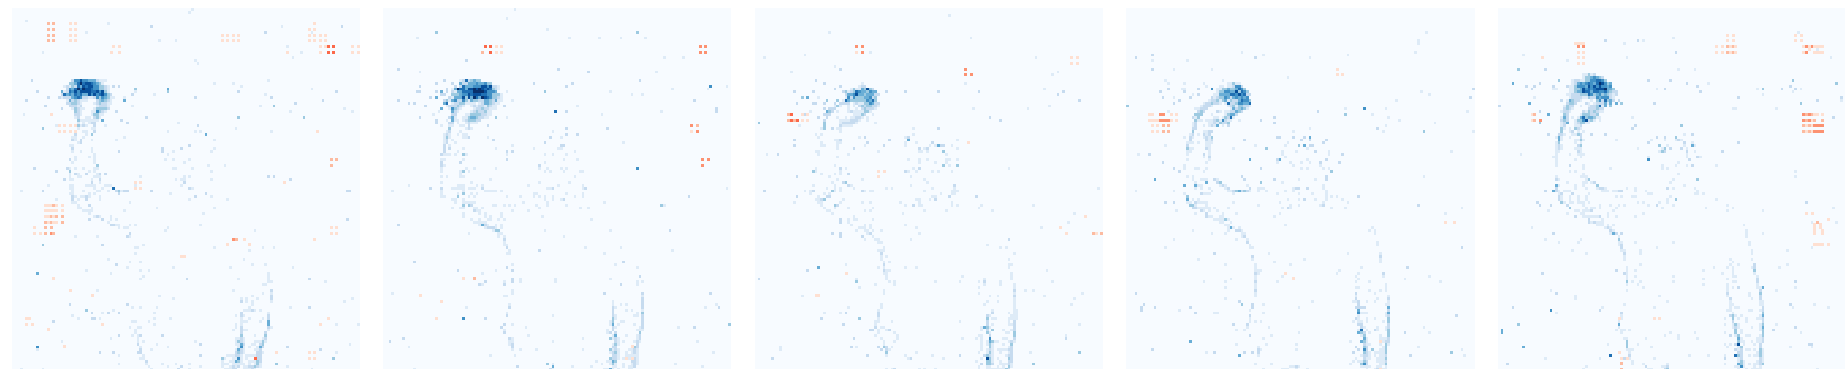

Supplement: supplementary_material [file attachment]

# IBMGestures

Success rate

Median L0

Num. frames

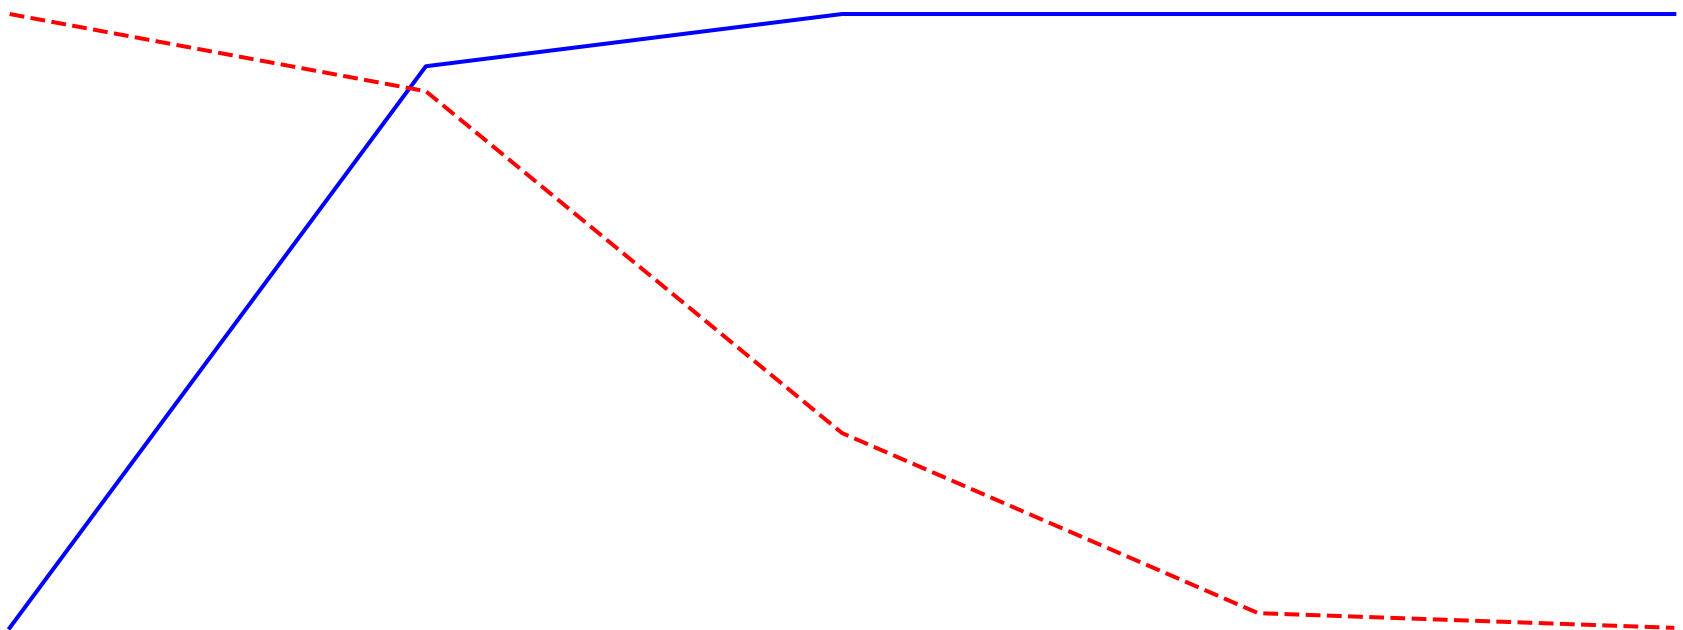

Supplement: supplementary_material [file attachment]

Two →  
Six

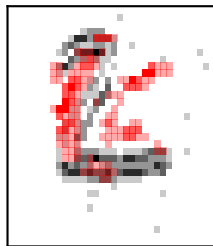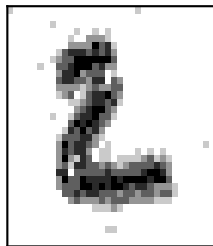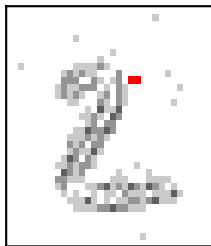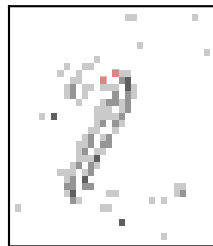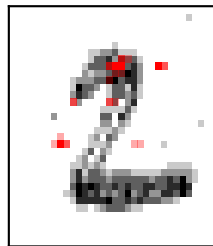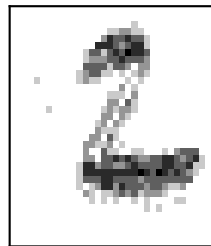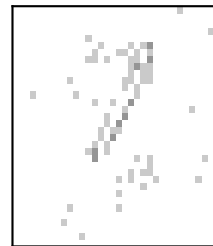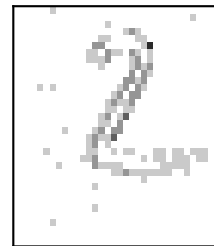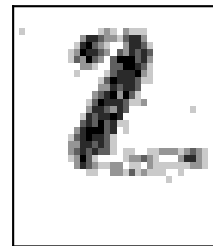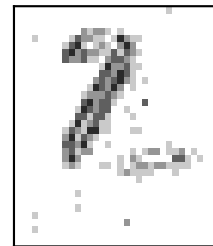

Nine →  
Four

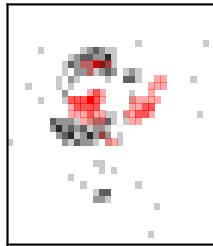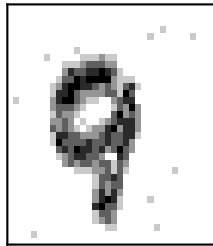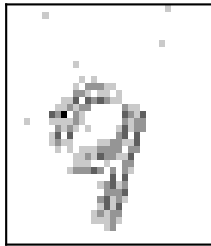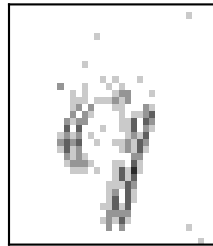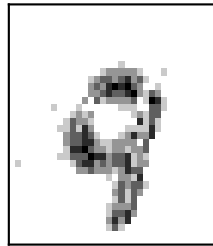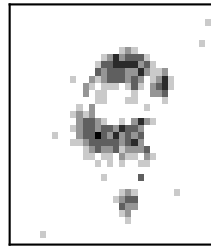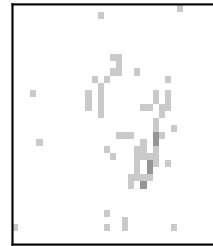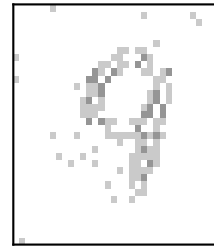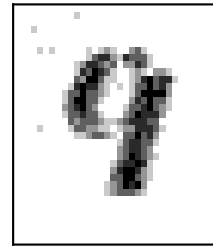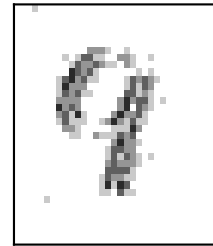

Three →  
Five

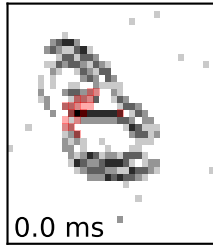

0.0 ms

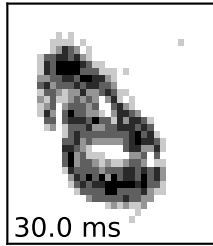

30.0 ms

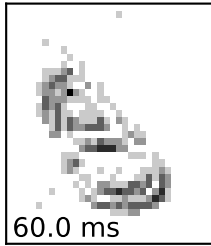

60.0 ms

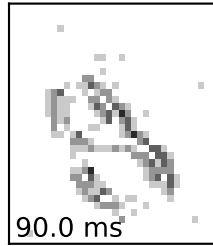

90.0 ms

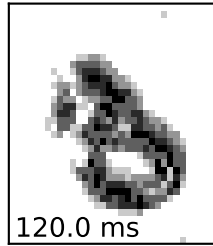

120.0 ms

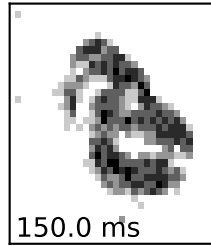

150.0 ms

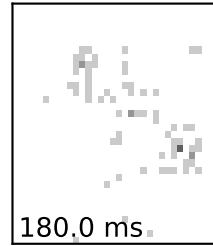

180.0 ms

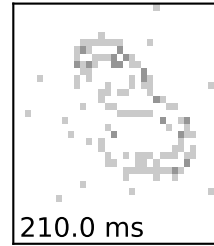

210.0 ms

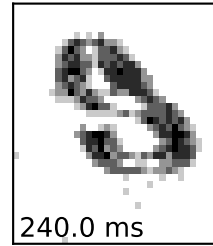

240.0 ms

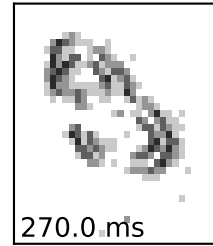

270.0 ms

Supplement: supplementary_material [file attachment]

# Confusion matrix, IBM Gestures (on chip)

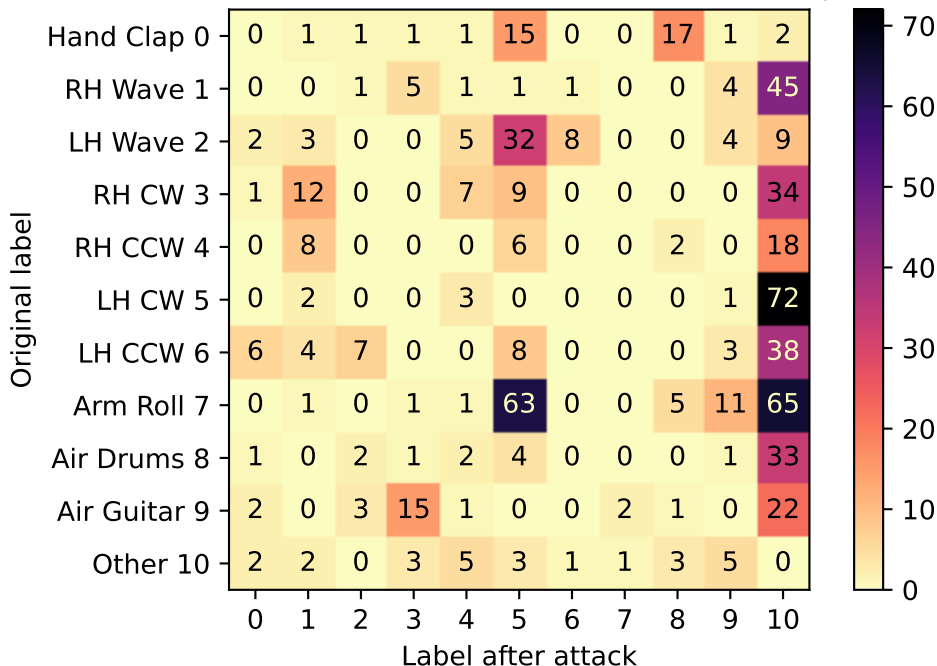

Supplement: supplementary_material [file attachment]

Air Guitar →  
Arm Roll

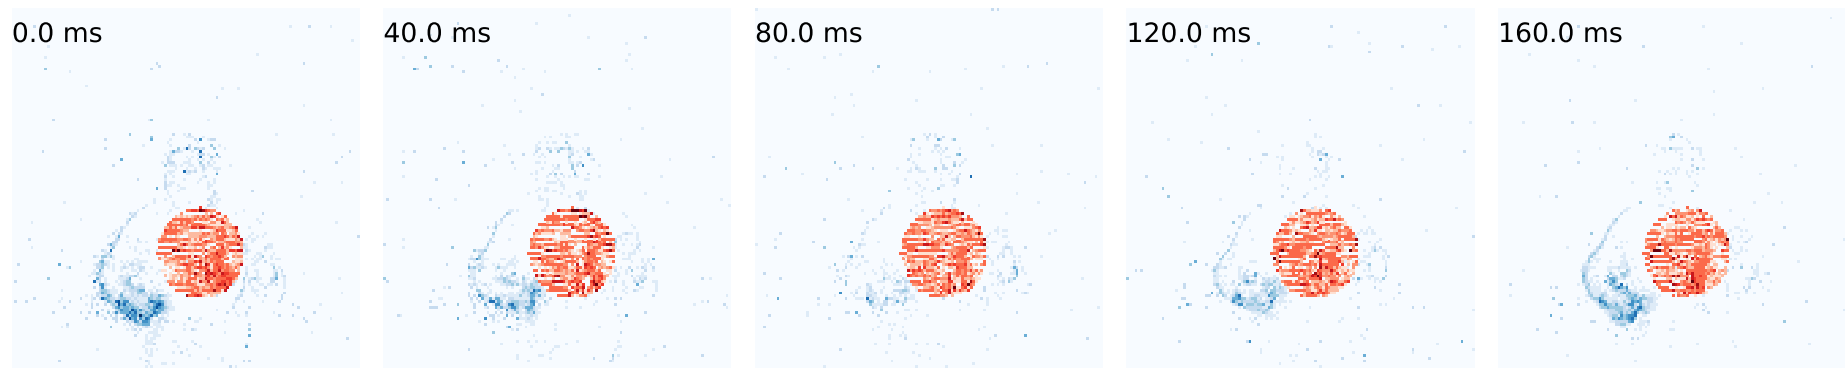

Hand Clap →  
Arm Roll

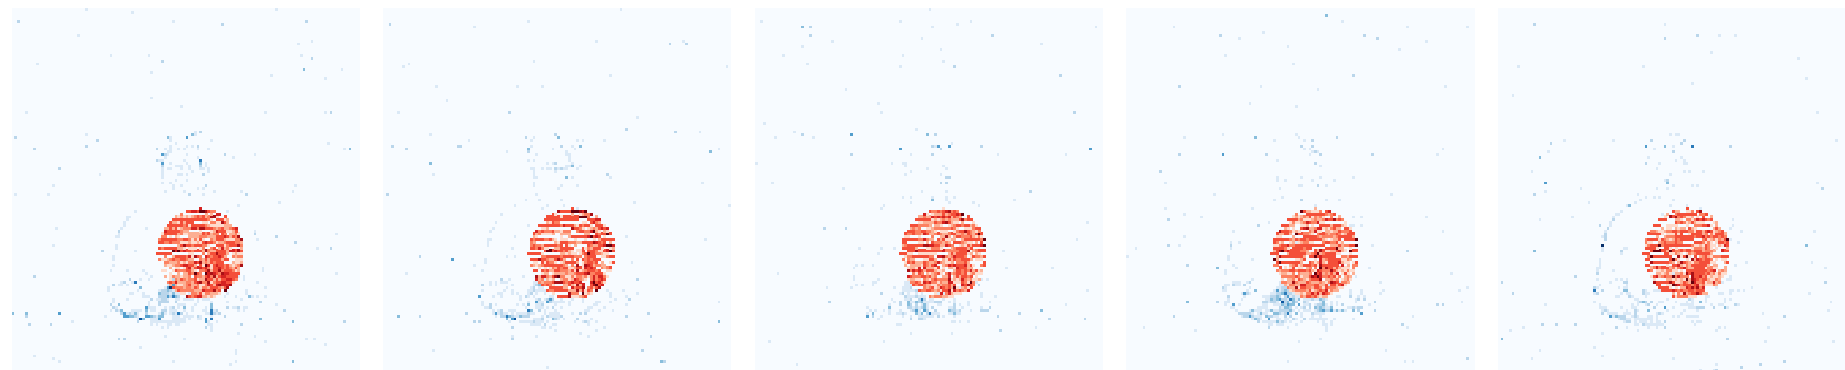

RH Wave →  
Arm Roll

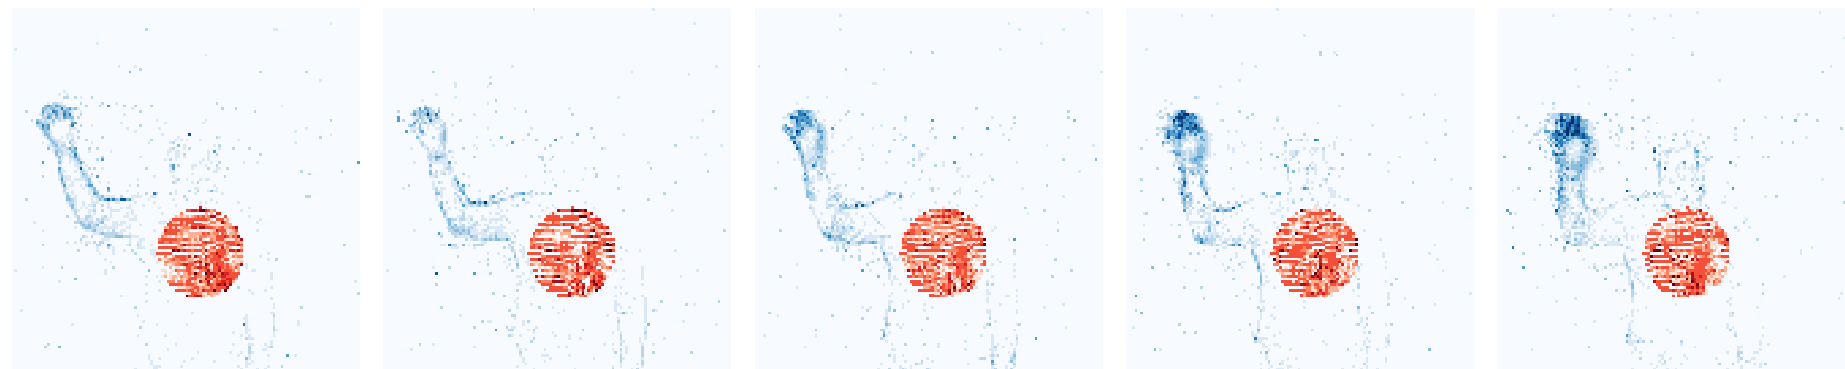

Supplement: supplementary_material [file attachment]

Profile of perturbation in time

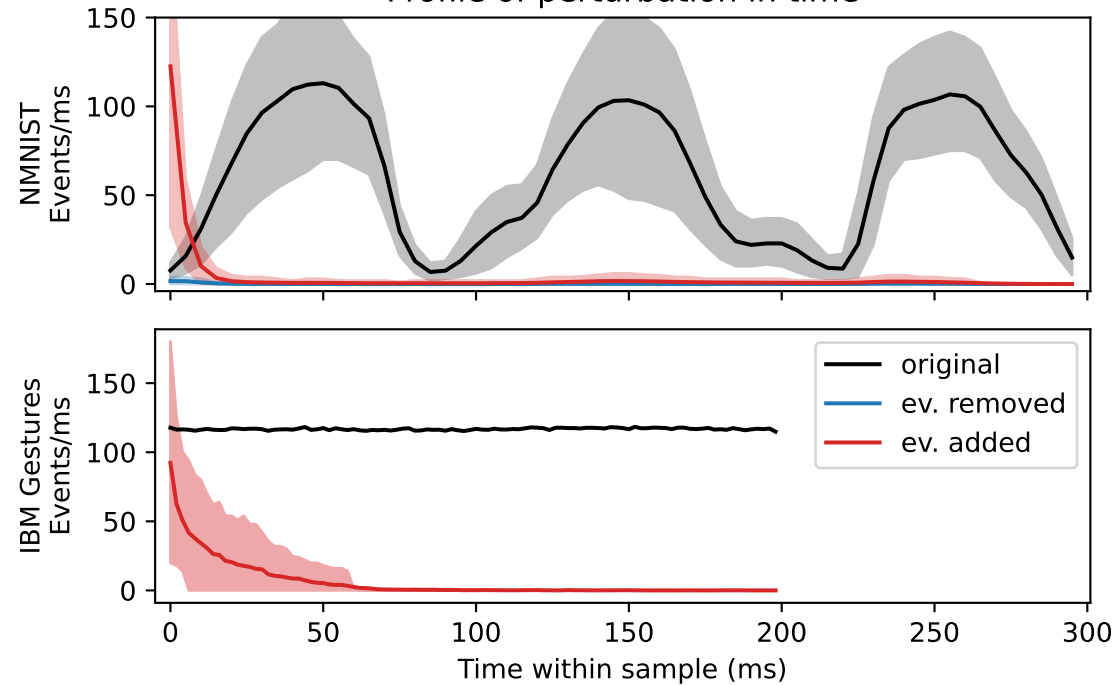

Supplement: supplementary_material [file attachment]

BMNIST

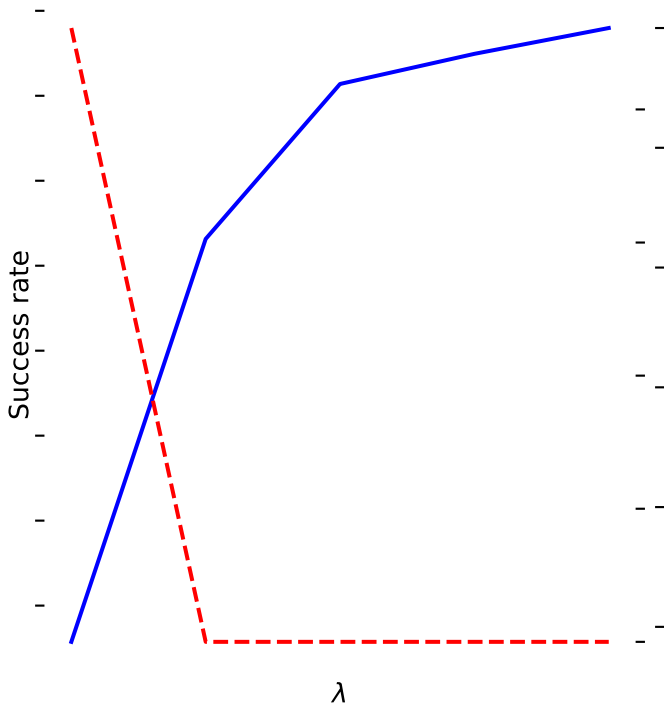

NMNIST

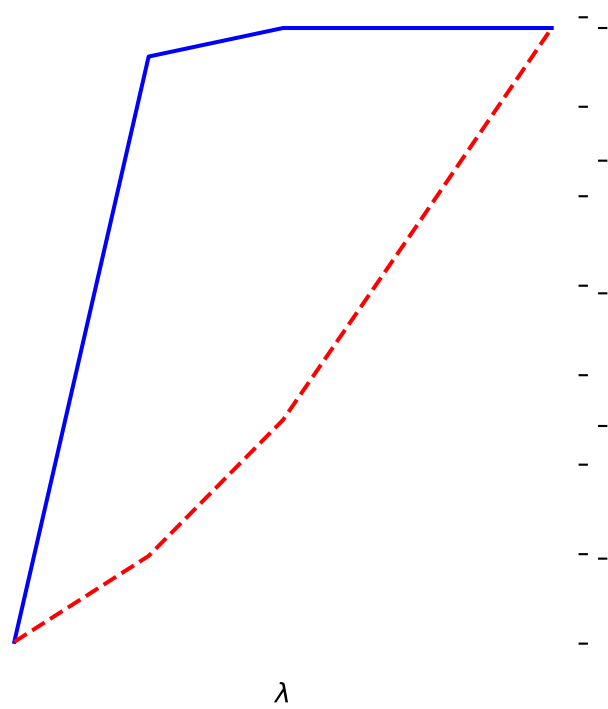

IBMGestures

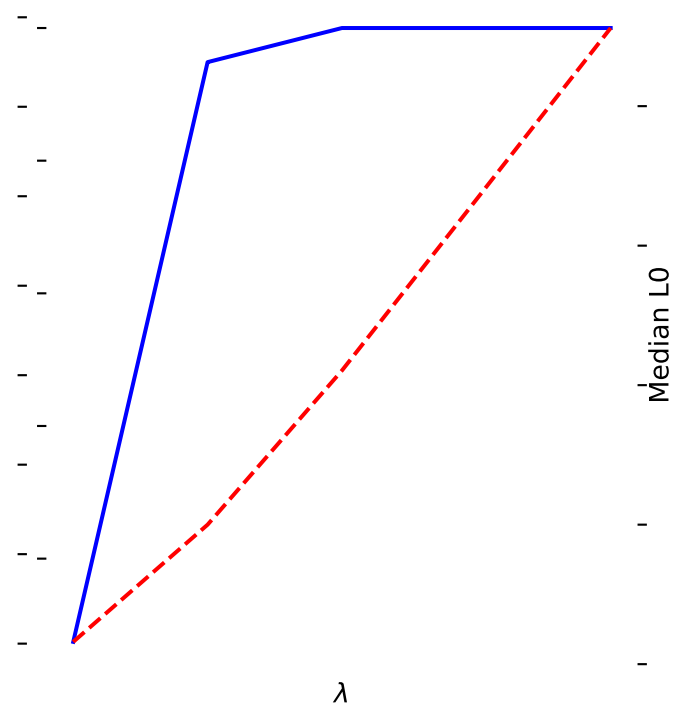

Supplement: supplementary_material [file attachment]

Distribution of perturbation sizes

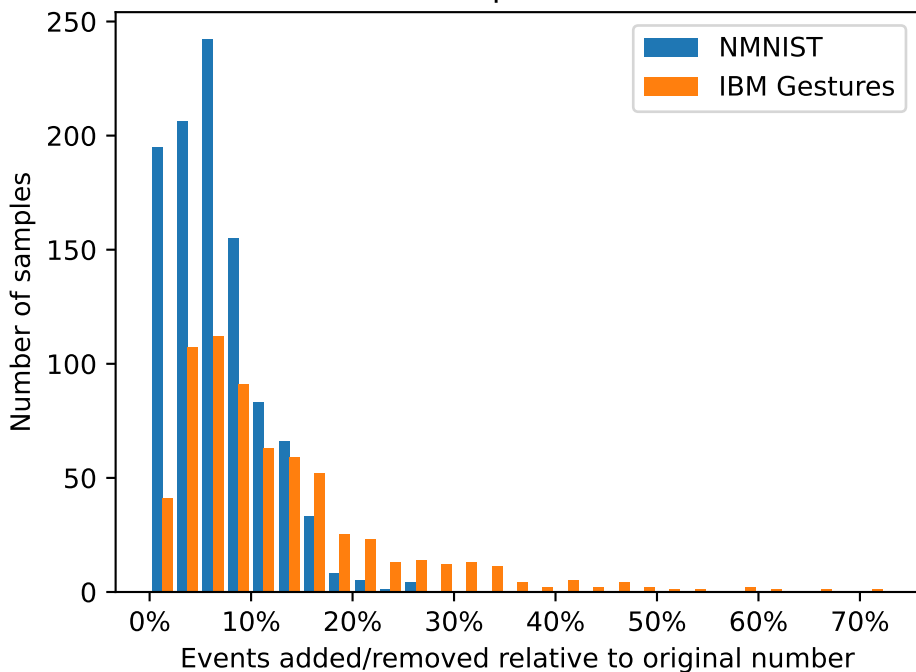

Supplement: supplementary_material [file attachment]
